# Supplementary material for: Facile synthesis of size-tunable micro-octahedra via metal–organic coordination
Source: Royal Society of Chemistry journal article supplement (doi:10.1039/b908876h), 2009-01-01
Supplement: b908876h.pdf [file b908876h.pdf]

## Electronic Supplementary Information (ESI)

# Facile synthesis of size-tunable micro-octahedrons via metal-organic coordination

Hao Wang,<sup>a,c</sup> Yi Zeng,<sup>a,c</sup> Jin Shi Ma,<sup>a</sup> Hongbing Fu,<sup>\*a</sup> Jiannian Yao,<sup>\*a</sup>  
Albina I. Mikhaleva,<sup>b</sup> and Boris A. Trofimov<sup>\*b</sup>

*a* Beijing National Laboratory for Molecular Sciences (BNLMS), Key Laboratory of Photochemistry, Institute of Chemistry, Chinese Academy of Sciences, Zhongguancun, Beijing, 100190, P. R. China.

E-mail: (J. Y.) jnyao@iccas.ac.cn; (H. F.) hongbing.fu@iccas.ac.cn

Fax: +86-10-82616517; Tel: +86-10-82616517

*b* A. E. Favorsky Irkutsk Institute of Chemistry, Siberian Branch of the Russian Academy of Sciences, 1 Favorsky Str., Irkutsk, 664033, Russian Federation.

E-mail: (B. A. T.) boris\_trofimov@irioch.irk.ru

*c* Graduate University of Chinese Academy of Sciences (GUCAS), Beijing 100049, P. R. China

## Experimental section

### A. Materials

All starting materials were purchased from Aldrich Co., Germany and used without further purification. The solvents methanol, dichloromethane were purchased from Beijing Chemical Co., China.

### B. Measurements

The ESI-MS measurements were carried out with a Bruker APEX II instrument.  $^1\text{H}$  NMR and  $^{13}\text{C}$  NMR spectra were recorded with a Bruker Avance dpx 300 MHz instrument using TMS as internal standard. The morphologies and sizes of the as-prepared  $\text{Zn}(\text{PyrPy})_2$  micro-octahedrons were characterized by field emission scanning electron microscopy (FE-SEM, Hitachi S-4300) at an accelerating voltage of 15 kV. To minimize sample charging, a thin layer of Pt was deposited onto the samples before SEM examination. Energy-dispersive X-ray analysis (EDX) were carried out by using a Hitachi, S-4300 equipped with an energy-dispersive X-ray detector. X-ray diffraction (XRD) measurements were performed by using a Rigaku X-Ray Diffractometer (D/max-2400) with an X-ray source of  $\text{Cu K}\alpha$  ( $\lambda = 1.5406 \text{ \AA}$ ) at 40 kV and 120 mA, at a scan rate of 0.028 ( $2\theta$ ) per 0.12 s.

The stationary UV-visible absorption spectra of the  $\text{Zn}(\text{PyrPy})_2$  solution was measured on a Perkin-Elmer Lambda 35 spectrometer with a scanning speed of 480 nm/min and a slit width of 1 nm. The stationary fluorescence spectra were performed on a Hitachi F-4500 fluorescence spectrophotometer using a right angle configuration. Slits were set to provide widths of 5 nm for both the excitation and the emission monochromators. Cuvettes with a 1 cm path length were used. All the spectroscopic measurements were carried out at room temperature.

Photoluminescence (PL) kinetics were measured using the time-resolved fluorescence spectrometer. Briefly, PL collected with the 90-degree-geometry was dispersed by a polychromator (250is, Chromex) and collected with a photon-counting type streak camera (C5680, Hamamatsu Photonics). Streak camera used a Ti:Sapphire femtosecond laser system running at 1 KHz. The system's output wavelength was set to the desired excitation at 360 nm by using an optical parameter amplifier (OPA800-CF,

Spectra-Physics). The time-resolved spectra were recorded with a temporal resolution of about 100 ps and a spectral resolution of 2 nm. The excitation pulse energy was about 100 nJ/pulse which was focused onto a spot 0.5 mm in diameter. To optimize the signal-to-noise ratio, 4000 photon counts were collected. The data detected by digital camera (C4742-95, Hamamatsu) was routinely transferred to PC for analysis with HPDTA software. All the spectroscopic measurements were carried out at room temperature.

Crystals suitable for X-ray diffraction studies were grown from CH<sub>2</sub>Cl<sub>2</sub>-CH<sub>3</sub>OH solution. Accurate unit cell parameters were determined by a least-squares fit of  $2\theta$  values, measured for 200 strong reflections, and intensity data sets were measured on a Bruker Smart 1000 CCD or Rigaku R-Axis Rapid IP diffractometer with Mo K $\alpha$  radiation ( $\lambda = 0.71073$  Å) at room temperature. The intensities were corrected for Lorentz and polarization effects, but no corrections for extinction were made. Crystal structure was solved by direct methods. Crystallographic data and experimental details for structure analyses are summarized in Table S1.

ESI-MS Spectrum,pyrpy

#:1 Ret.Time:Single 2.287(Scan#:99)

Mass Peaks:48 Base Peak:145.05(3557665) Polarity:Pos Segment1 - Event1

Intensity

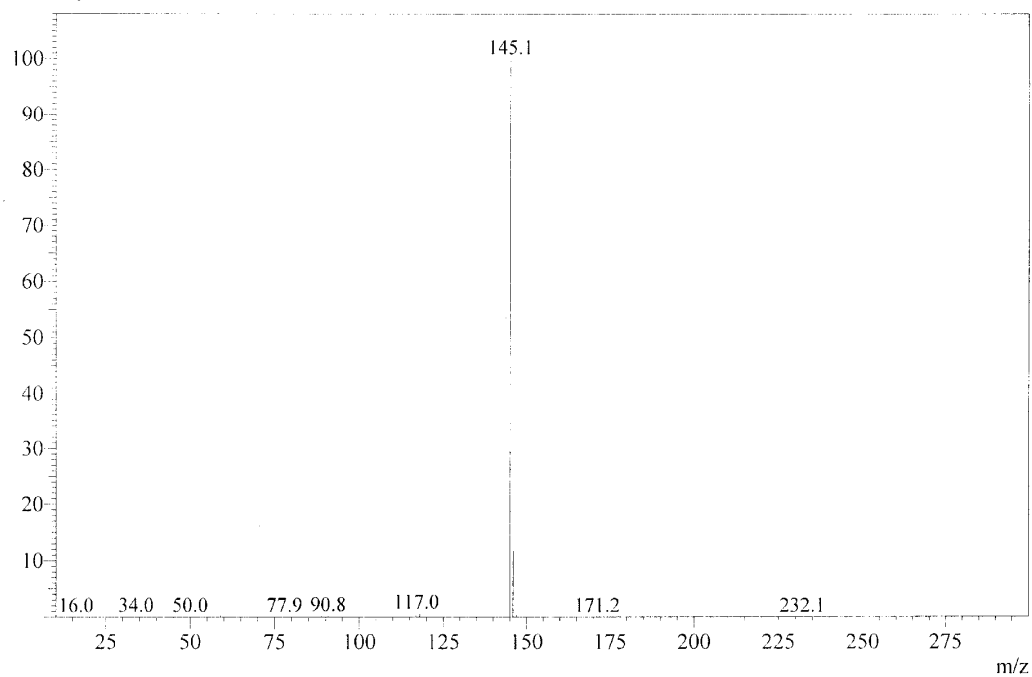

**Fig. S1** Mass spectrum of PyrPy.

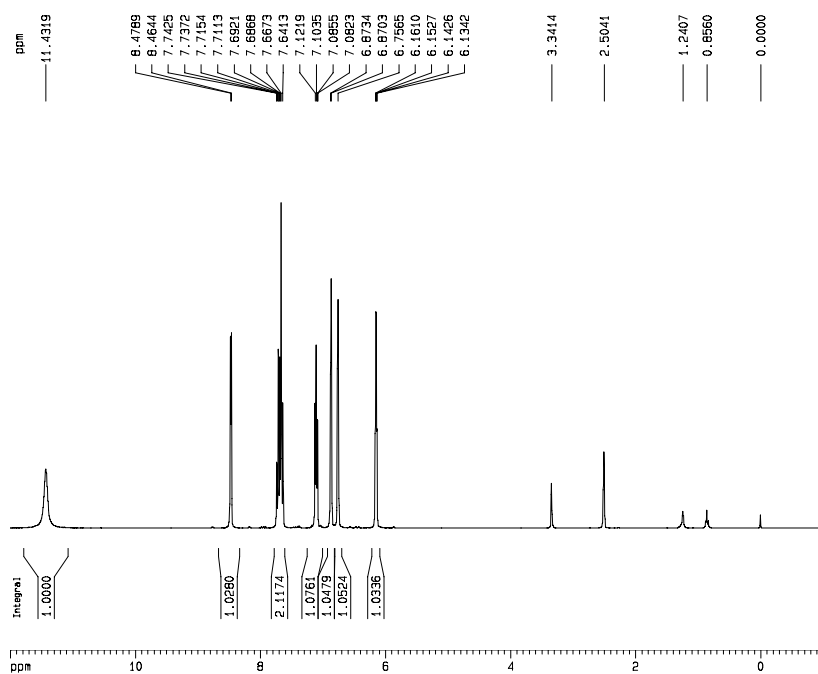

```

Current Data Parameters
NAME      pripy
EXPNO    10
PROCNO   1

F2 - Acquisition Parameters
Date_    20090322
Time     13.20
INSTRUM  spect
PROBHD   5 mm DUL 13C-1
PULPROG  zg30
TD        65536
SOLVENT  DMSO
NS        16
DS        0
SWH       8992.806 Hz
FIDRES    0.137219 Hz
AQ        3.6438615 sec
RG        203.2
DM        55.500 usec
DE        6.00 usec
TE        673.2 K
D1        1.00000000 sec
MCHREST   0.00000000 sec
MCHWK     0.01500000 sec

===== CHANNEL f1 =====
NUC1      1H
P1        7.00 usec
PL1       -1.00 dB
SFO1      300.1324010 MHz

F2 - Processing parameters
SI        32768
SF        300.1299994 MHz
WDW       EM
SSB       0
LB        0.30 Hz
GB        0
PC        1.00

1D NMR plot parameters
CX        20.00 cm
CY        8.00 cm
F1P       12.000 ppm
F1        3601.56 Hz
F2P       -1.000 ppm
F2        -300.13 Hz
PPMCH     0.85000 ppm/cm
HZCM      195.08450 Hz/cm
    
```

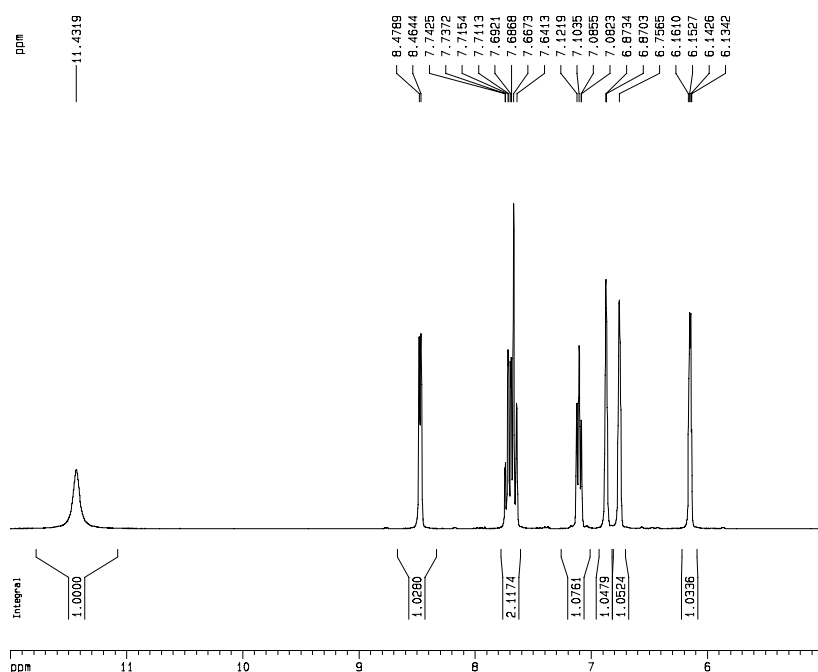

```

Current Data Parameters
NAME      pripy
EXPNO    10
PROCNO   1

F2 - Acquisition Parameters
Date_    20090322
Time     13.20
INSTRUM  spect
PROBHD   5 mm DUL 13C-1
PULPROG  zg30
TD        65536
SOLVENT  DMSO
NS        16
DS        0
SWH       8992.806 Hz
FIDRES    0.137219 Hz
AQ        3.6438615 sec
RG        203.2
DM        55.500 usec
DE        6.00 usec
TE        673.2 K
D1        1.00000000 sec
MCHREST   0.00000000 sec
MCHWK     0.01500000 sec

===== CHANNEL f1 =====
NUC1      1H
P1        7.00 usec
PL1       -1.00 dB
SFO1      300.1324010 MHz

F2 - Processing parameters
SI        32768
SF        300.1299994 MHz
WDW       EM
SSB       0
LB        0.30 Hz
GB        0
PC        1.00

1D NMR plot parameters
CX        20.00 cm
CY        8.00 cm
F1P       12.000 ppm
F1        3601.56 Hz
F2P       -1.000 ppm
F2        -300.13 Hz
PPMCH     0.85000 ppm/cm
HZCM      195.08450 Hz/cm
    
```

Fig. S2 <sup>1</sup>H NMR spectrum of PyrPy.

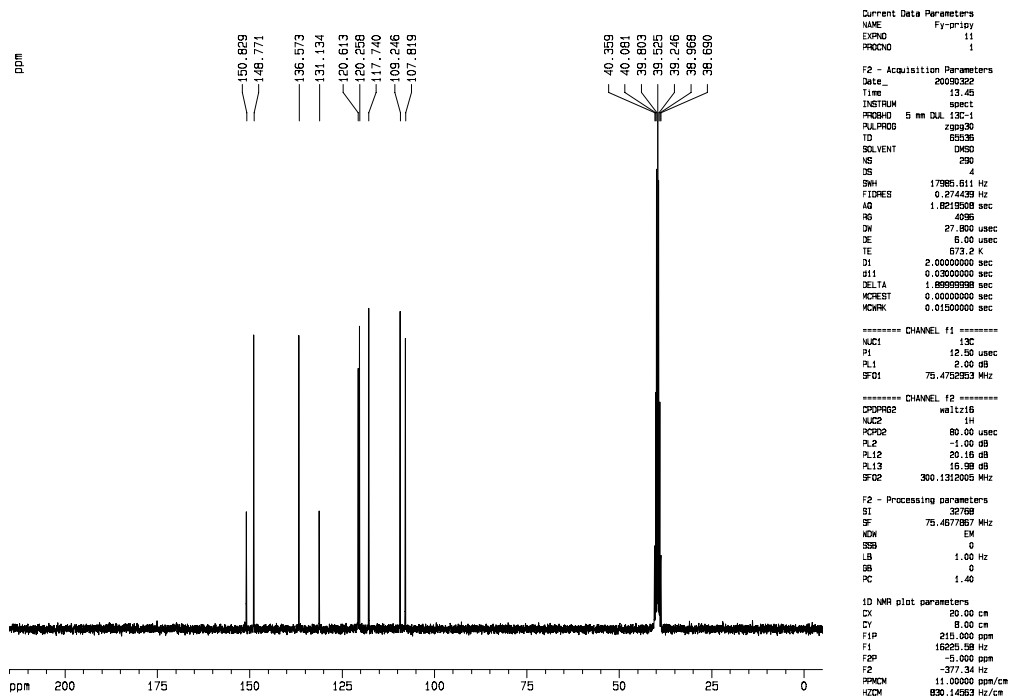

Fig. S3  $^{13}\text{C}$  NMR spectrum of PyrPy.

D:\Data\_IC\2009\200904\20090428\200904282610\_L11

printed: 4/28/2009 4:49:30 PM

### MALDI-TOF, CCA, zn, 2009, 04, 28

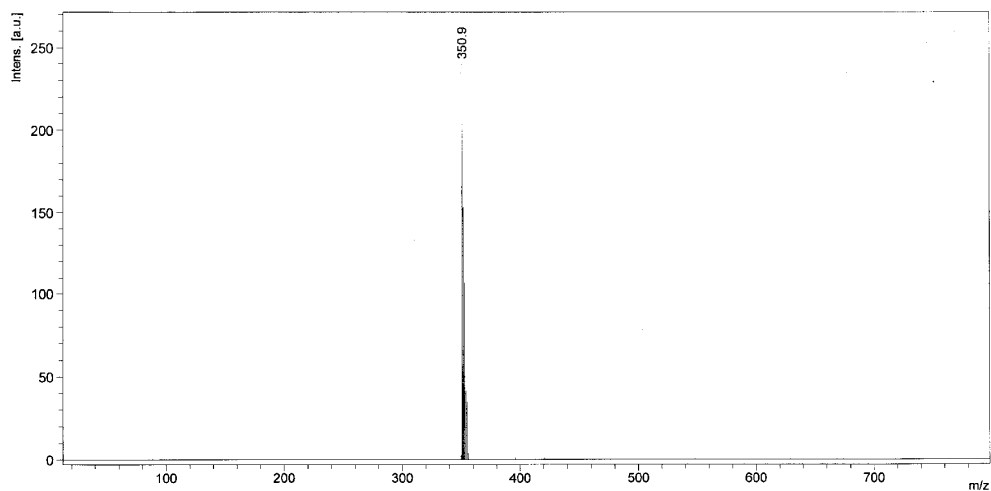

Fig. S4 Mass spectrum of  $\text{Zn}(\text{PyrPy})_2$ .

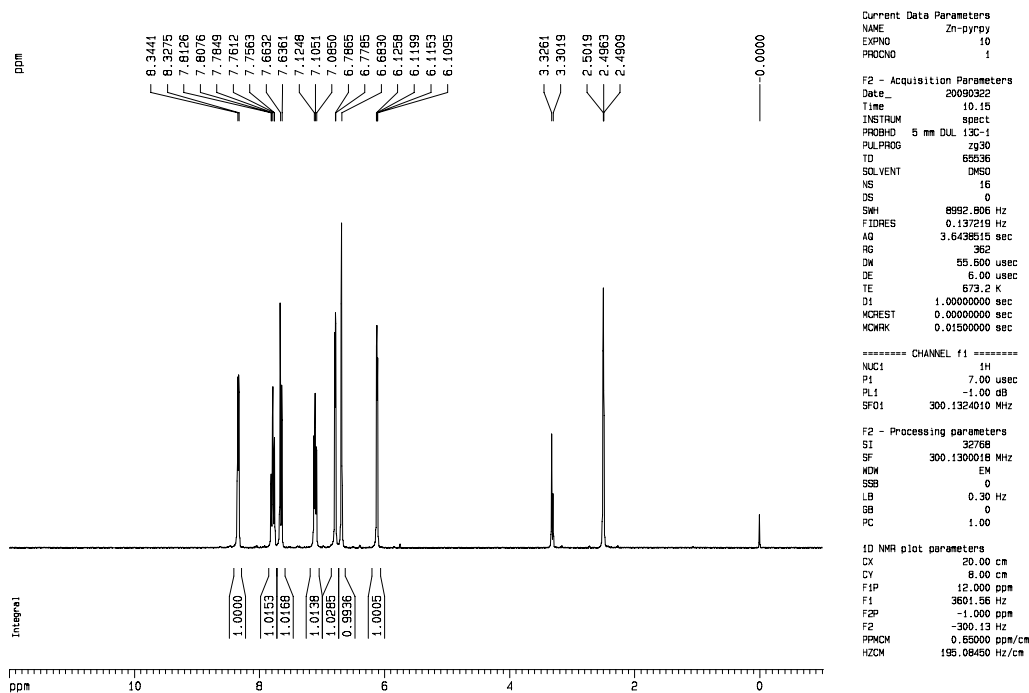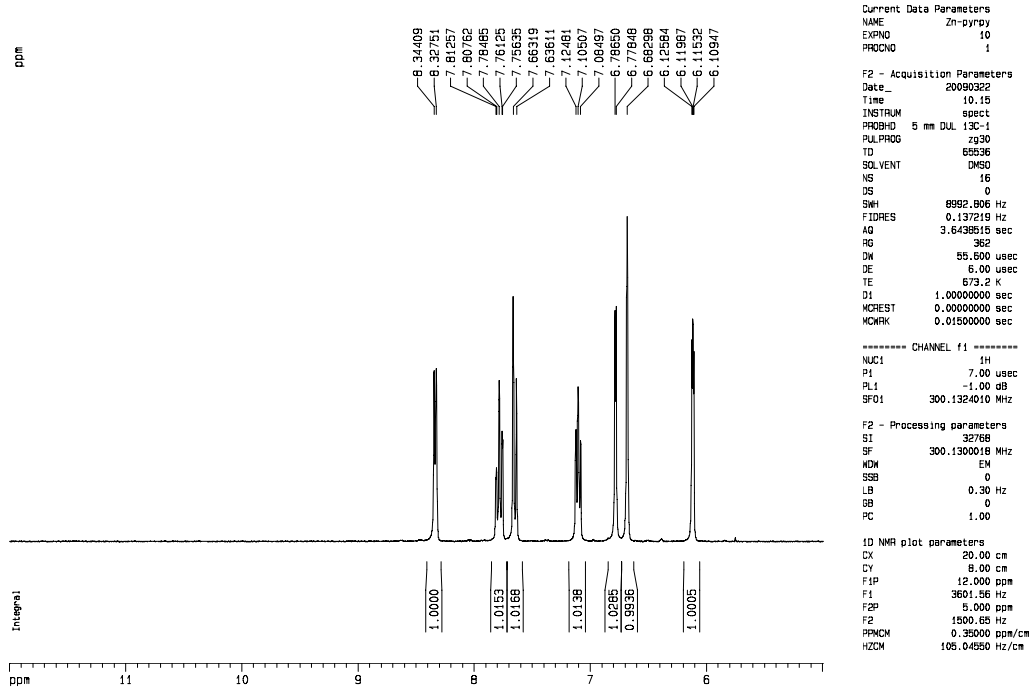

Fig. S5 <sup>1</sup>H NMR spectrum of Zn(PyrPy)<sub>2</sub>.

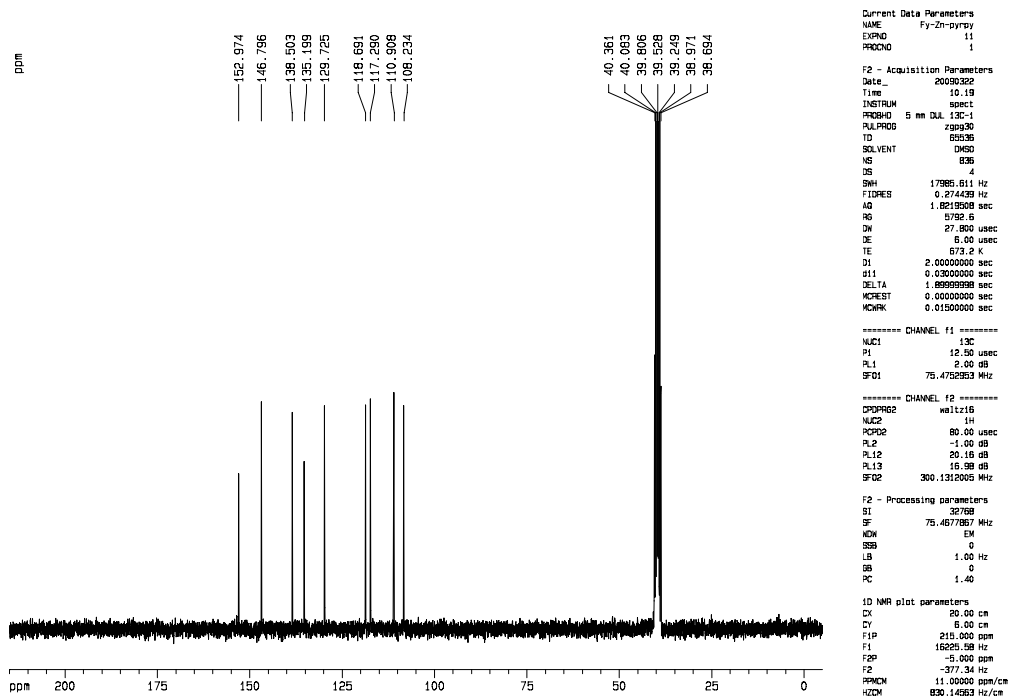

Fig. S6  $^{13}\text{C}$  NMR spectrum of  $\text{Zn}(\text{PyPyr})_2$ .



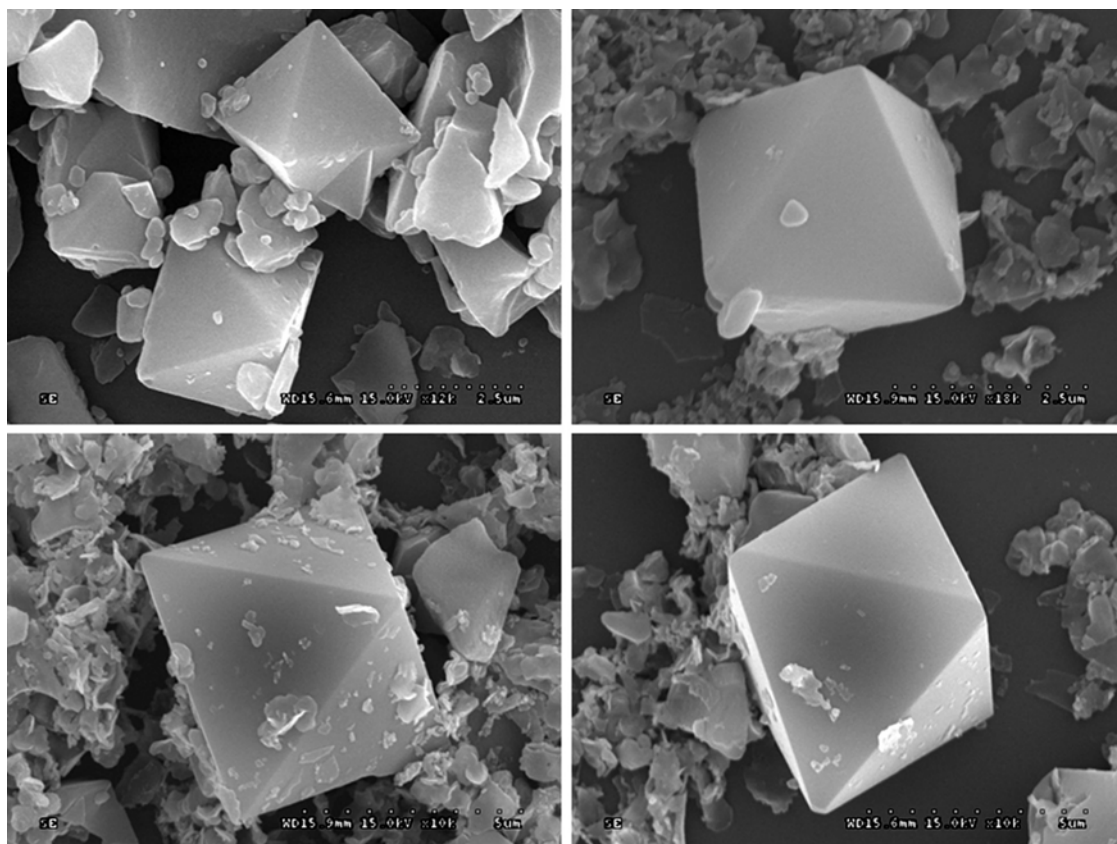

**Fig. S7** Typical FE-SEM images of Zn(PyPyr)<sub>2</sub> micro-octahedrons with a size of ~5 um at C=20 mM.

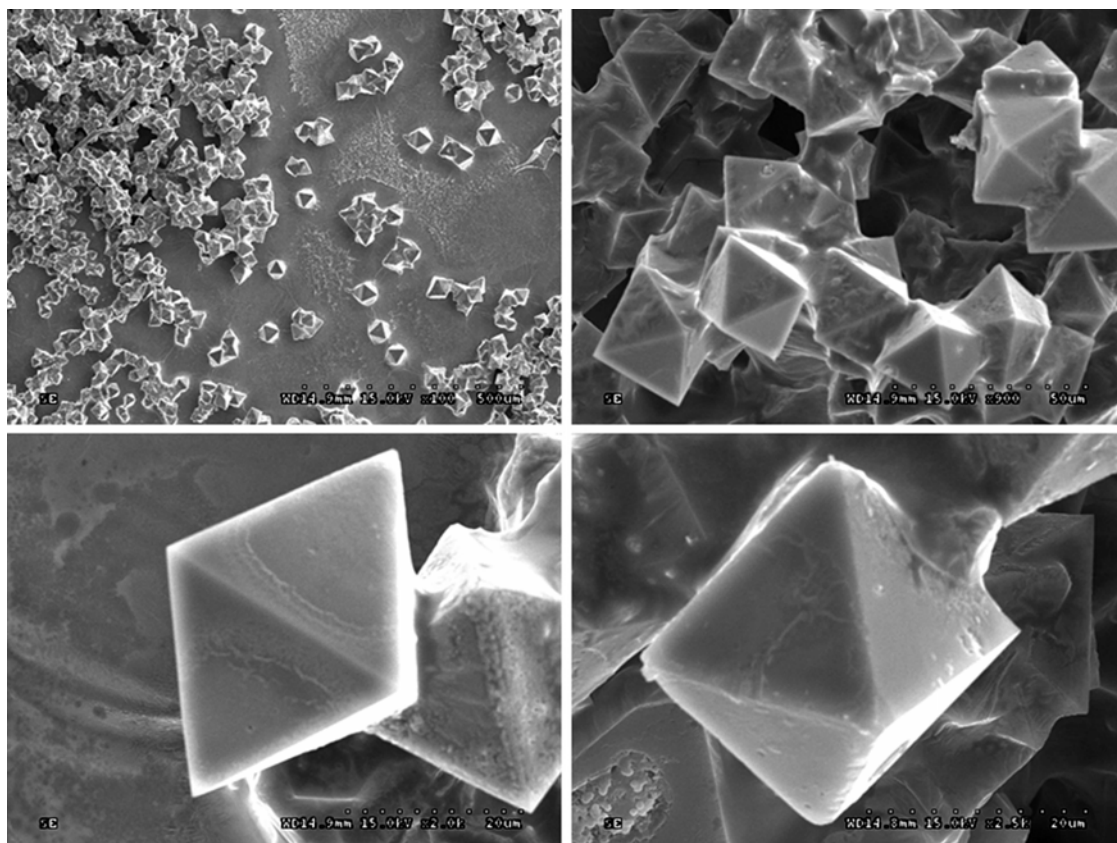

**Fig. S8** Typical FE-SEM images of  $\text{Zn(PyrPy)}_2$  micro-octahedrons with a size of  $\sim 25 \mu\text{m}$  at  $C=16 \text{ mM}$ .

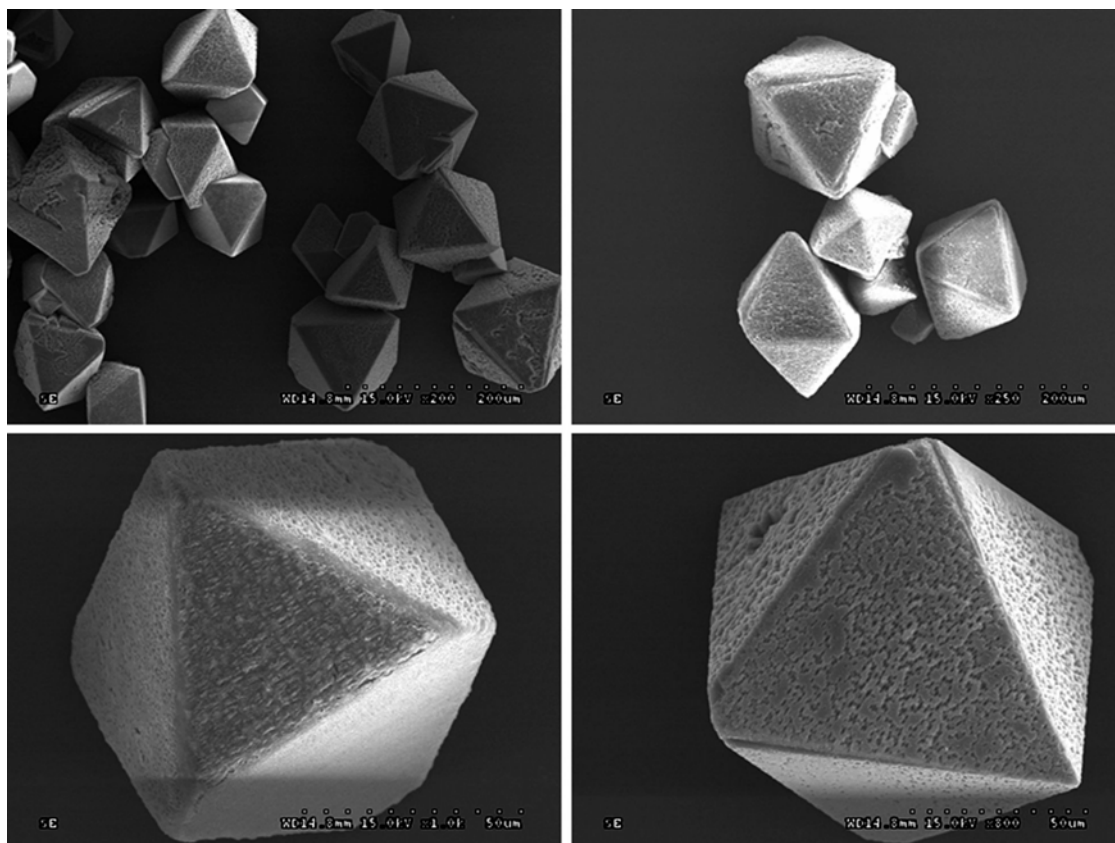

**Fig. S9** Typical FE-SEM images of  $\text{Zn(PyPyr)}_2$  micro-octahedrons with a size of  $\sim 75 \mu\text{m}$  at  $C=9 \text{ mM}$ .

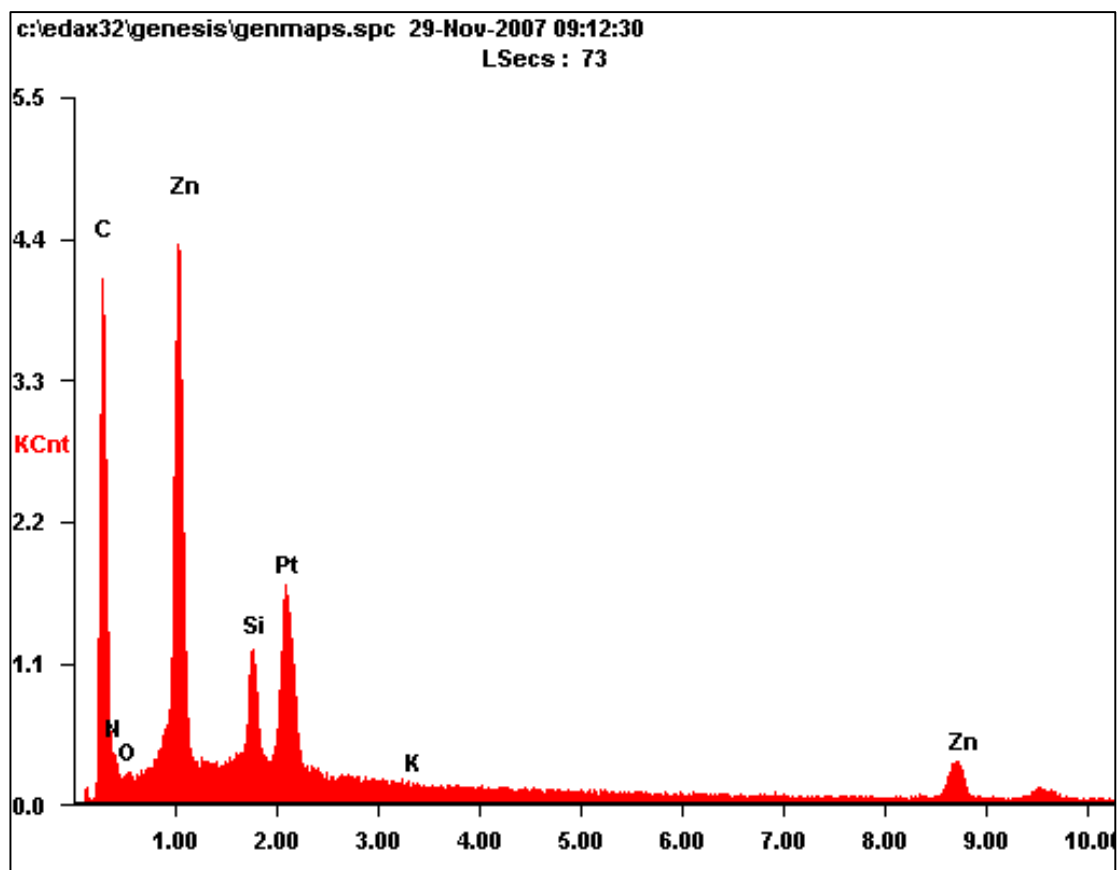

**Fig. S10** The energy dispersive X-ray (EDX) spectrum of the micro-octahedrons. The peak of Si arises from the Si grid for SEM characterization. The presence of O comes mainly from atmospheric contamination due to exposure of the sample to air. The peak of Pt arises from the pre-deposited Pt layer for SEM characterization.

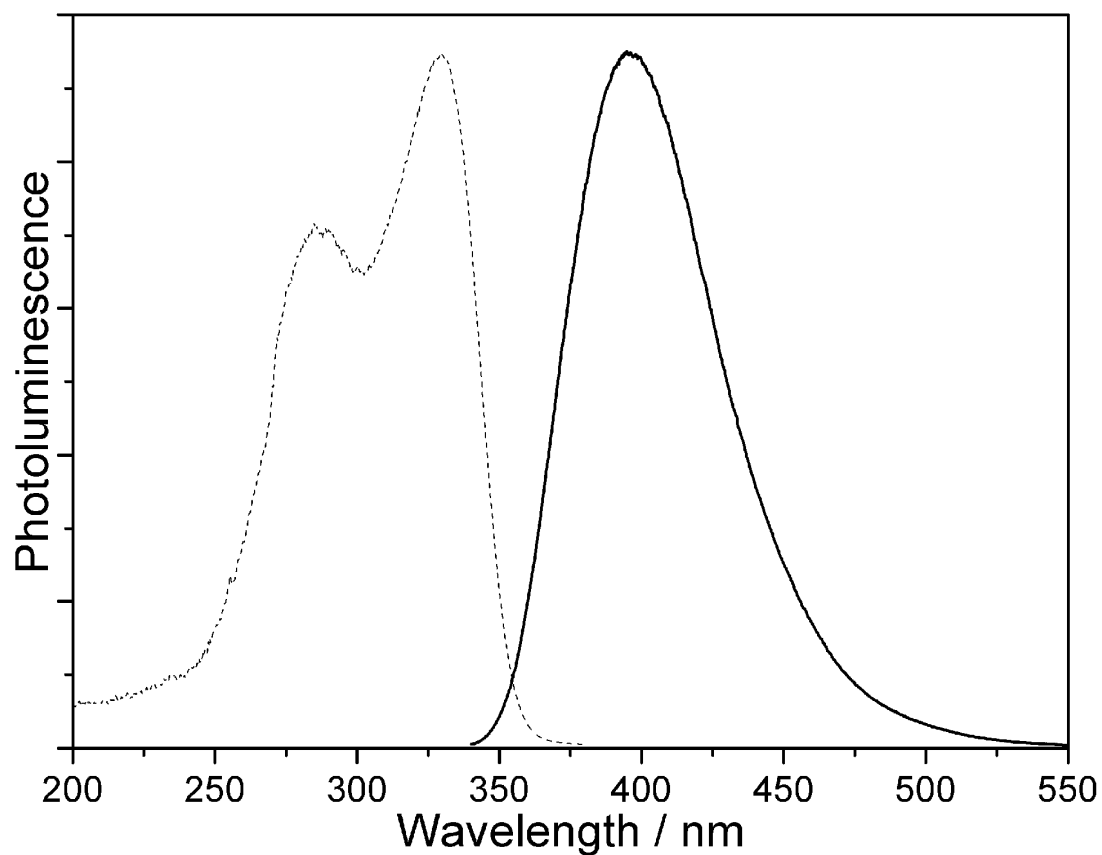

**Fig. S11** Excitation (dashed line) and emission (solid line) spectra of PyrPy dissolved in dichloromethane ( $10^{-5} M$ ).

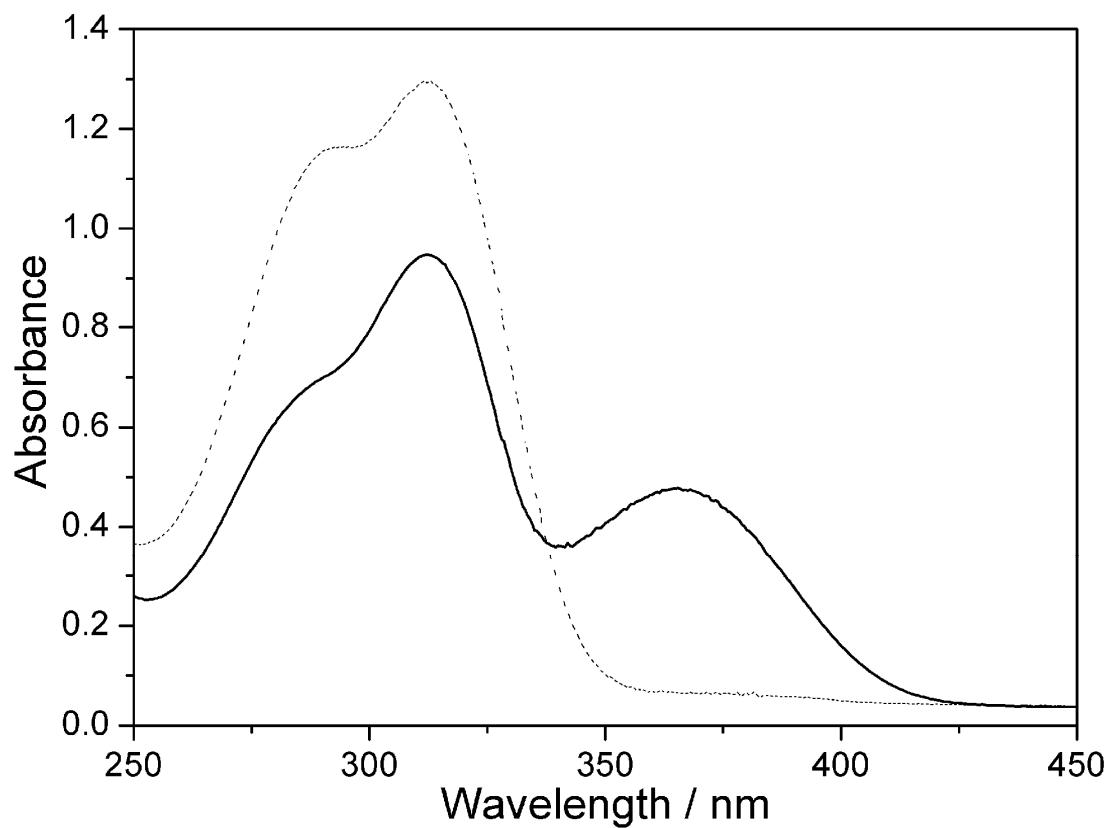

**Fig. S12** Absorbance spectra of PyrPy (dashed line) and Zn(PyrPy)<sub>2</sub> (solid line) dissolved in dichloromethane (10<sup>-5</sup> M).

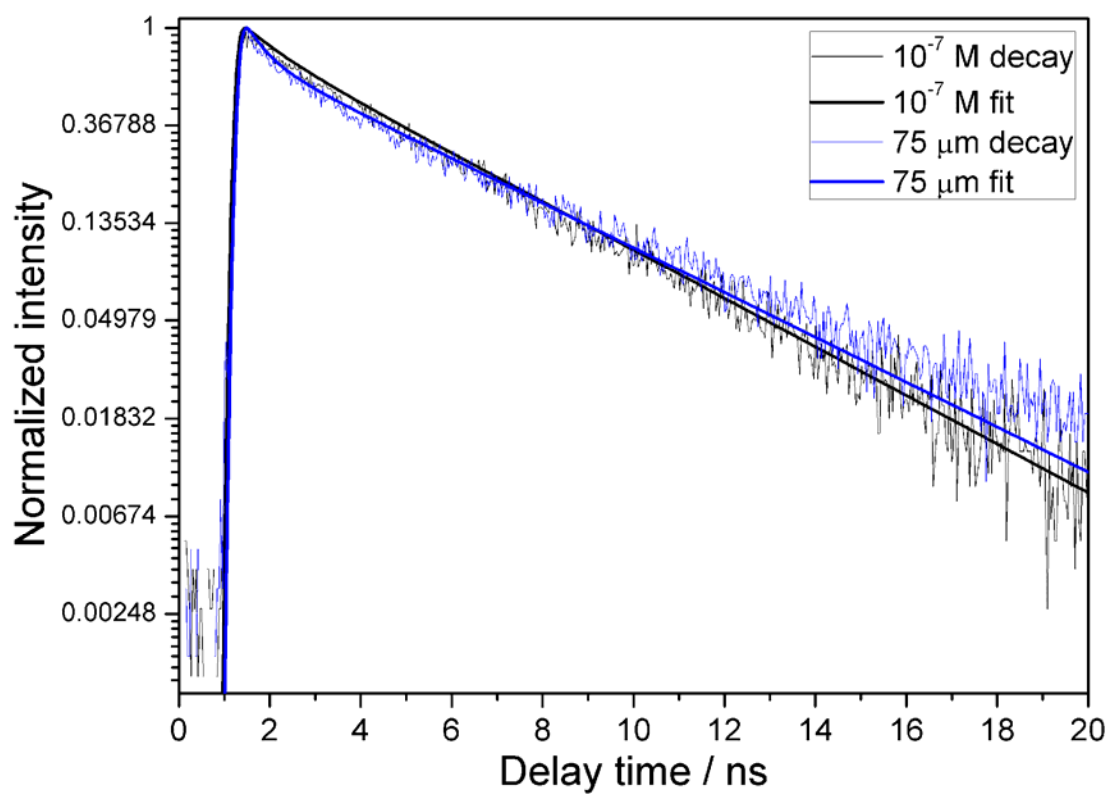

**Fig. S13** The PL signal decay curves for Zn(pyrpy)<sub>2</sub> micro-octahedrons with a mean size of 75 μm and solution of 1×10<sup>-7</sup> M.

**Table S1** Crystal data and structure refinement for Zn(PyPy)<sub>2</sub>.

|                                                   |                                                   |
|---------------------------------------------------|---------------------------------------------------|
| Empirical formula                                 | C <sub>18</sub> H <sub>14</sub> N <sub>4</sub> Zn |
| Formula weight                                    | 351.70                                            |
| Temperature (K)                                   | 173(2)                                            |
| Wavelength (Å)                                    | 0.71073                                           |
| Crystal system                                    | Tetragonal                                        |
| Space group                                       | P 4 <sub>1</sub> 2 <sub>1</sub> 2                 |
| a (Å)                                             | 8.2425(12)                                        |
| b (Å)                                             | 8.2425(12)                                        |
| c (Å)                                             | 23.659(5)                                         |
| Alpha (deg.)                                      | 90.00                                             |
| Beta (deg.)                                       | 90.00                                             |
| Gamma (deg.)                                      | 90.00                                             |
| Volume (Å <sup>3</sup> )                          | 1607.3(5)                                         |
| Z                                                 | 4                                                 |
| Calculated density (Mg/m <sup>3</sup> )           | 1.453                                             |
| Absorption coefficient (mm <sup>-1</sup> )        | 1.532                                             |
| F(000)                                            | 720                                               |
| Crystal size (mm)                                 | 0.48 x 0.40 x 0.36                                |
| Theta range for data collection (deg.)            | 2.62 to 27.48                                     |
| Limiting indices                                  | -10<=h<=8, -10<=k<=9, -30<=l<=30                  |
| Reflections collected / unique                    | 12088 / 1848 [R(int) = 0.0387]                    |
| Completeness to theta = 27.48                     | 100.0 %                                           |
| Absorption correction                             | Semi-empirical from equivalents                   |
| Max. and min. transmission                        | 0.6086 and 0.5268                                 |
| Refinement method                                 | Full-matrix least-squares on F <sup>2</sup>       |
| Data / restraints / parameters                    | 1848 / 0 / 105                                    |
| Goodness-of-fit on F <sup>2</sup>                 | 1.161                                             |
| Final R indices [I>2sigma(I)]                     | R1 = 0.0288, wR2 = 0.0778                         |
| R indices (all data)                              | R1 = 0.0292, wR2 = 0.0780                         |
| Absolute structure parameter                      | 0.000(18)                                         |
| Largest diff. peak and hole (e. Å <sup>-3</sup> ) | 0.382 and -0.283                                  |

**Table S2** The PL lifetimes for Zn(PyPy)<sub>2</sub> micro-octahedrons and solutions.

| Samples              | τ <sub>1</sub> (ns) <sup>a</sup> | A <sub>1</sub> <sup>a</sup> | τ <sub>2</sub> (ns) <sup>a</sup> | A <sub>2</sub> <sup>a</sup> | τ (ns) <sup>a</sup> |
|----------------------|----------------------------------|-----------------------------|----------------------------------|-----------------------------|---------------------|
| 75 μm                | 0.47                             | 0.35                        | 4.36                             | 0.65                        | 3.00                |
| 1×10 <sup>-7</sup> M | 0.88                             | 0.18                        | 4.03                             | 0.82                        | 3.46                |

<sup>a</sup> The decay kinetics were fitted by a sum of exponential functions:  $I(t) = A_1 \exp(-t/\tau_1) + A_2 \exp(-t/\tau_2)$ , where the A and τ terms represent the pre-exponential factors and time constants, respectively;  $\tau = \tau_1 A_1 + \tau_2 A_2$ .
